# Supplementary material for: How do oxygen vacancies affect carrier transport and interface states in β-Ga2O3/4H-SiC heterojunction photodetectors at elevated temperatures?
Source: Royal Society of Chemistry journal article supplement (doi:10.1039/d4tc03284e), 2024-01-01
Supplement: d4tc03284e1.pdf [file d4tc03284e1.pdf]

Supplementary Materials for

**How do oxygen vacancies affect carrier transport and interface states in  $\beta$ -Ga<sub>2</sub>O<sub>3</sub>/4H-SiC heterojunction photodetectors at elevated temperatures?**

Xiaoning Zhang,<sup>1,2</sup> Ling-Xu Zhao,<sup>1,2</sup> Huanhuan Zhao,<sup>1,2</sup> Jia-Yue Yang<sup>1,2,a)</sup> and Linhua Liu<sup>1,2,a)</sup>

<sup>1</sup>School of Energy and Power Engineering, Shandong University, Jinan, China 250061

<sup>2</sup> Optics & Thermal Radiation Research Center, Institute of Frontier and Interdisciplinary Science, Shandong University, Qingdao, China 266237

a) Electronic mail: [jy\\_yang@sdu.edu.cn](mailto:jy_yang@sdu.edu.cn) and [liulinhua@sdu.edu.cn](mailto:liulinhua@sdu.edu.cn)

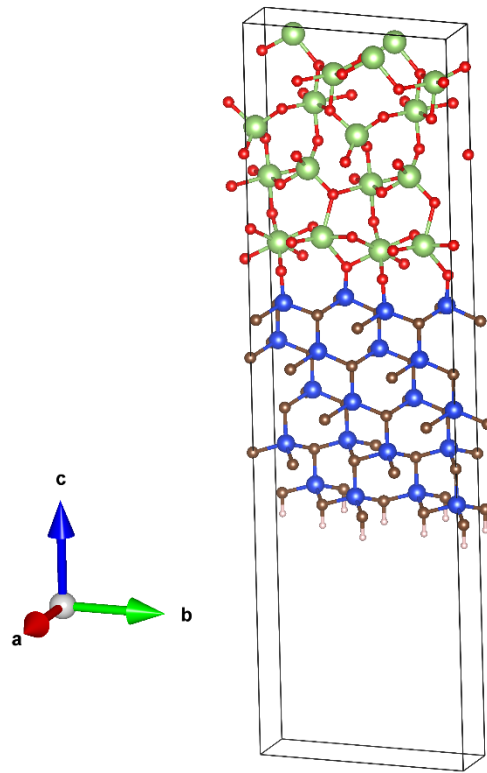

Fig. S1 The three-dimensional structure of  $\beta$ -Ga<sub>2</sub>O<sub>3</sub>/4H-SiC heterojunction at 0K.

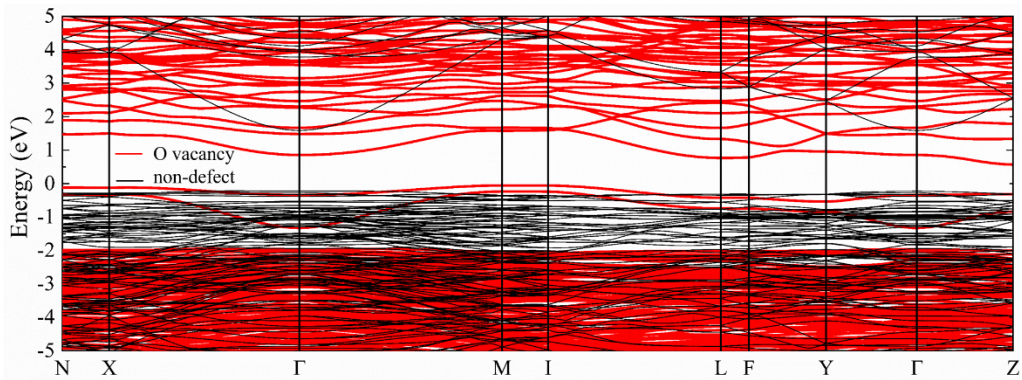

Fig. S2 The band structure of defective  $\text{Ga}_2\text{O}_3$  with O vacancies and non-defect.

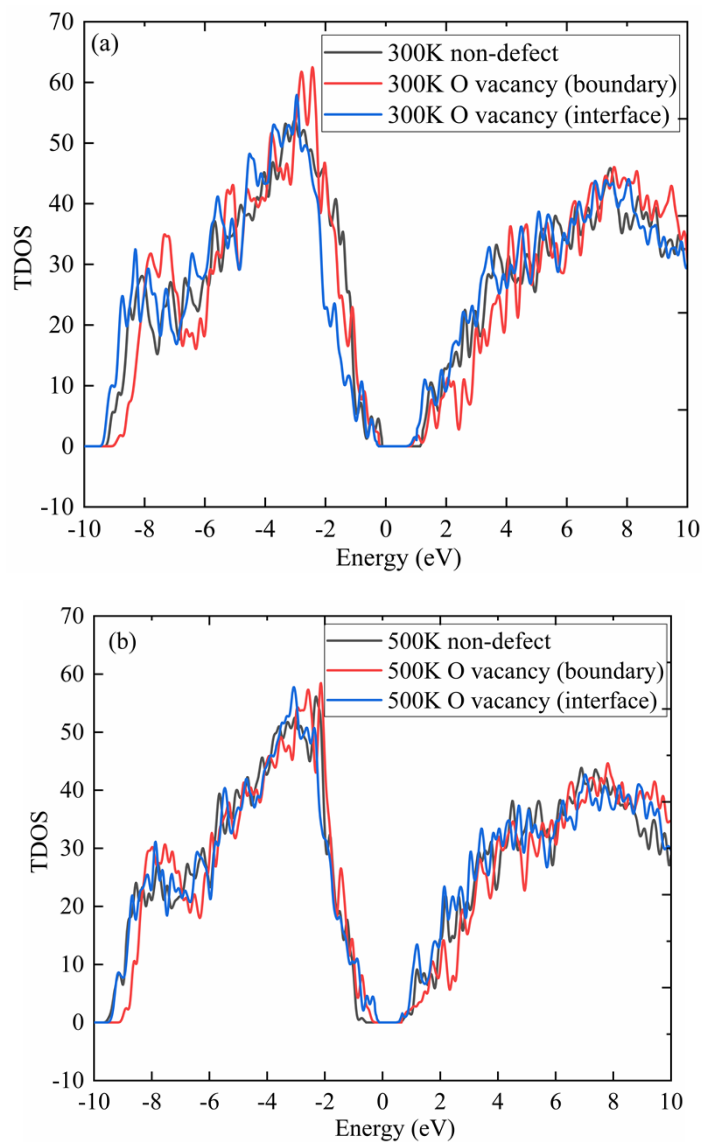

Fig. S3 The TDOS of  $\beta\text{-Ga}_2\text{O}_3/4\text{H-SiC}$  heterojunction under (a) 300K and (b) 500K calculated using PBE functional.
